# Supplementary material for: Prognosis after surgical replacement with a bioprosthetic aortic valve in patients with severe symptomatic aortic stenosis: systematic review of observational studies
Source: PubMed Central journal article supplement — BMJ. 2016 Sep 29;354:i5065. doi: 10.1136/bmj.i5065 (PMC5040922; doi:10.1136/bmj.i5065), 2016-09-29
Supplement: rees034569.ww1_default.pdf [file rees034569.ww1_default.pdf]

## **APPENDIX – A**

### **Ovid Medline (June week 1 2016) and Medline in-process (June 2016):**

1. Aortic Stenosis.mp. or exp Aortic Valve Stenosis/
2. (aortic valve implantation or TAVR or transcatheter or transfemoral or transapical or transaxillary or SAVR or heart valve replacement or surgical aortic valve replacement or surgical AVR or SAVR or TAVI or aortic valve replacement or transvascular).af.
3. exp Cohort Studies/
4. 1 and 2 and 3
5. limit 4 to yr="2006 -Current"
6. limit 5 to humans

### **Ovid EMBASE:**

1. aortic stenosis.mp. or exp aorta stenosis/
2. (aortic valve implantation or heart valve implantation or TAVR or TAVI or transcatheter or transfemoral or transapical or transaxillary or SAVR or heart valve replacement or surgical aortic valve replacement or surgical AVR or SAVR or aortic valve replacement or transvascular).af.
3. cohort.tw.
4. 1 and 2 and 3
5. limit 4 to yr="2006 -Current"
6. limit 5 to human

## APPENDIX – B

|                    |       |          |        |
|--------------------|-------|----------|--------|
| <b>Article ID:</b> |       |          |        |
| Author:            | Year: | Journal: | Title: |

|                         |     |    |
|-------------------------|-----|----|
| <b>Paper:</b>           |     |    |
| • Published $\geq 2005$ | YES | NO |

|                                  |     |    |
|----------------------------------|-----|----|
| <b>Population<sup>3</sup>:</b>   |     |    |
| • Aortic valve stenosis patients | YES | NO |
| • Adults ( $\geq 18$ years old)  | YES | NO |

|                                          |     |    |
|------------------------------------------|-----|----|
| <b>Intervention:</b>                     |     |    |
| • Transcatheter Aortic Valve Implant or, | YES | NO |
| • Surgical Aortic Valve intervention     |     |    |

|                                                                                                  |     |    |
|--------------------------------------------------------------------------------------------------|-----|----|
| <b>Outcomes reported:</b>                                                                        |     |    |
| • Mortality                                                                                      | YES | NO |
| • Change in NYHA                                                                                 |     |    |
| • Stroke                                                                                         |     |    |
| • MI                                                                                             |     |    |
| • Atrial fibrillation                                                                            |     |    |
| • Structural valve deterioration                                                                 |     |    |
| • Valve in valve                                                                                 |     |    |
| ALL OUTCOMES SHOULD BE SEEN AT 2 YEARS OR GREATER THAN 2 YEARS. Anything before 2 years, EXCLUDE |     |    |

|                                               |     |    |
|-----------------------------------------------|-----|----|
| <b>Type of article<sup>7</sup>:</b>           |     |    |
| • Cohort study (retrospective or prospective) | YES | NO |

|                                                           |     |    |
|-----------------------------------------------------------|-----|----|
| <b>Duplicated population:</b>                             |     |    |
| • If duplicated, does this study provide new information? | YES | NO |
| • If duplicated, is study more recent?                    |     |    |

|                           |         |  |
|---------------------------|---------|--|
| <b>Study inclusion:</b>   |         |  |
| • All the answers are YES | INCLUDE |  |
| • Any answer is NO        | EXCLUDE |  |

## APPENDIX C – Baseline demographics and population characteristics

| Study                | Recruitment Period | N    | Age (Mean ± SD)   | % Male | Coronary Artery Disease (CAD) % | Chronic Obstructive Pulmonary Disease (COPD) (%) | Diabetes (%) | HTN (%) | Atrial fibrillation (%) | Left Ventricular Ejection Fraction (LVEF) | NYHA III/IV (%) | Prior Coronary Artery Bypass Grafting (CABG) (%) | Prior Myocardial Infarct (MI) (%) | Log Euro Score II (Mean ± SD) | Concomitant CABG-SAVR | Outcome:                               |
|----------------------|--------------------|------|-------------------|--------|---------------------------------|--------------------------------------------------|--------------|---------|-------------------------|-------------------------------------------|-----------------|--------------------------------------------------|-----------------------------------|-------------------------------|-----------------------|----------------------------------------|
| Accola 2008          | 1989 - 2003        | 801  | 74.0 ± 4.4        | 62.30% | 55.20%                          | NR                                               | NR           | NR      | NR                      | NR                                        | NR              | 49.70%                                           | NR                                | NR                            | 52.80%                | Survival                               |
| Ali 2011             | 1991 - 2001        | 147  | 62.0 ± 12.0       | 70.00% | NR                              | NR                                               | 6.80%        | 38.10%  | NR                      | NR                                        | 53.00%          | NR                                               | NR                                | NR                            | 29.90%                | Survival                               |
| Amabile 2014         | 1997 - 2004        | 500  | 74.5 ± 9.6        | 52.00% | 35.00%                          | NR                                               | 22.00%       | NR      | NR                      | 58.60%                                    | 41.00%          | NR                                               | NR                                | NR                            | 24.40%                | Stroke, SVI in SAVR, Survival          |
| Anselmi 2014         | 1994 - 2004        | 955  | 74.7 ± 6.8        | 63.00% | NR                              | NR                                               | NR           | NR      | NR                      | 59.00%                                    | 41.90%          | 1.80%                                            | NR                                | 58.6% ± 7.8%                  | 14.60%                | Stroke, SVI in SAVR, Survival          |
| Ashikhmina 2011      | 1993 - 2007        | 2890 | 78.0 ± 5.0        | 63.00% | NR                              | NR                                               | NR           | NR      | NR                      | 57.00%                                    | 73.00%          | 12.00%                                           | NR                                | NR                            | 52.00%                | Length of Stay, SVD in SAVR, Survival  |
| Aupart 2006          | 1984 - 2003        | 1049 | 72.6 *(39.0-91.0) | 63.00% | NR                              | NR                                               | NR           | NR      | 7.90%                   | NR                                        | 36.00%          | NR                                               | NR                                | NR                            | 26.00%                | SVD in SAVR, Survival                  |
| Auriemma 2006        | 1993 - 2004        | 318  | 69.0 ± 9.0        | 73.00% | 27.00%                          | NR                                               | NR           | NR      | NR                      | NR                                        | 68.00%          | NR                                               | NR                                | NR                            | 27.00%                | SVD in SAVR, Survival                  |
| Aydin 2014           | 1990 - 2012        | 114  | 76.6 *(70.0-87.0) | 56.00% | 24.50%                          | 22.80%                                           | 22.80%       | 77.20%  | 14.90%                  | 56.90%                                    | 86.00%          | 2.60%                                            | 28.90%                            | NR                            | 25.40%                | Afib, Stroke, Length of Stay, Survival |
| Barone-Rochette 2014 | 2005 - 2012        | 154  | 74.0 ± 9.0        | 62.00% | 29.00%                          | 12.00%                                           | 23.00%       | 62.00%  | 9.00%                   | 60.00%                                    | 27.00%          | NR                                               | NR                                | 57.1% ± 5.5%                  | 28.60%                | Survival                               |
| Beholz 2010          | 2004 - 2006        | 256  | 74.5 ± 6.4        | 45.00% | NR                              | NR                                               | 24.00%       | 73.00%  | 10.00%                  | NR                                        | 62.90%          | NR                                               | NR                                | NR                            | 23.00%                | Survival                               |
| Benhameid 2008       | 1982 - 1992        | 161  | 69.0 ± 6.0        | NR     | NR                              | NR                                               | NR           | NR      | NR                      | NR                                        | NR              | NR                                               | NR                                | NR                            | NR                    | SVD in SAVR, Survival                  |
| Bernet 2007          | 1993 - 2003        | 1161 | 62.0 ± 12.0       | 65.00% | 30.00%                          | 6.70%                                            | 11.60%       | NR      | 16.60%                  | NR                                        | 55.00%          | NR                                               | NR                                | NR                            | NR                    | Survival                               |
| Bourguignon 2015     | 1984 - 2008        | 2559 | 70.7 ± 10.4       | 68.40% | NR                              | NR                                               | NR           | NR      | 9.10%                   | NR                                        | 34.80%          | NR                                               | NR                                | NR                            | 23.10%                | SVD in SAVR, Survival                  |



| Author          | Year        | n    | Age                  | MI     | Stroke  | Death  | MI     | Stroke | Death  | MI     | Stroke  | Death  | MI     | Stroke            | Death   | Outcome               |
|-----------------|-------------|------|----------------------|--------|---------|--------|--------|--------|--------|--------|---------|--------|--------|-------------------|---------|-----------------------|
| Gerckens 2011   | 2005 - 2006 | 52   | 81.0 ± 6.0           | 36.00% | NR      | NR     | NR     | NR     | NR     | NR     | 87.00%  | NR     | NR     | \$27.4 % ± 15.1%  | NR      | SVD in TAV            |
| Glaseret 2014   | 2002 - 2008 | 355  | 76.0 ± 9.0           | 54.00% | NR      | 7.00%  | 12.00% | NR     | 16.00% | 70.00% | NR      | NR     | NR     | NR                | NR      | Survival              |
| Glauber 2015    | 2004 - 2014 | 593  | 74.0 ± 6.0           | 52.00% | NR      | 13.00% | 21.00% | 70.00% | NR     | 60.00% | NR      | 0.50%  | 3.00%  | 5.76              | NR      | Stroke, Survival      |
| Grossi 2008     | 1996 - 2006 | 731  | NR                   | 49.90% | NR      | 17.60% | 17.10% | NR     | NR     | NR     | NR      | NR     | NR     | 17.20%            | NR      | Survival              |
| Grupper 2014    | 2004 - 2012 | 416  | 76.0 ± 14.0          | 42.00% | NR      | NR     | 32.00% | 59.00% | NR     | NR     | NR      | NR     | NR     | NR                | NR      | Survival              |
| Gunter 2013     | 2002 - 2012 | 2379 | 67.2 ± 13.4          | 63.20% | NR      | 21.90% | 30.80% | 82.10% | NR     | NR     | 43.10%  | NR     | 22.70% | NR                | 36.20%  | Survival              |
| Gurvitch 2010   | 2005 - 2006 | 70   | 84.7 ± 7.6           | NR     | NR      | NR     | 24.30% | NR     | NR     | NR     | NR      | NR     | 78.60% | \$31.7 % ± 16.0 % | NR      | SVD in TAV            |
| Hartzell 2011   | 2004 - 2005 | 362  | 75.1 ± 10.5          | 48.00% | 42.50%  | NR     | 21.30% | 86.20% | NR     | NR     | 18.20%  | 7.70%  | 15.70% | NR                | 41.80%  | Survival              |
| Higgins 2011    | 1982 - 2003 | 3343 | 68.1 ± 11.2          | 65.70% | NR      | 7.80%  | 10.00% | 23.20% | 7.80%  | NR     | 75.70%  | NR     | 9.20%  | NR                | 43.70%  | Survival              |
| Hong 2013       | 1995 - 2010 | 351  | 60.0 ± 12.0          | 61.00% | NR      | NR     | 12.00% | NR     | NR     | NR     | 6.00%   | NR     | NR     | NR                | NR      | Survival              |
| Horst 2011      | 2004 - 2009 | 143  | 71.0 ± 7.0           | 57.00% | NR      | NR     | NR     | NR     | 10.00% | NR     | NR      | NR     | NR     | NR                | 3.50%   | Survival              |
| Hosono 2013     | 1993 - 2009 | 132  | 76.1 ± 3.7           | 46.20% | NR      | NR     | 18.90% | 59.10% | 9.10%  | NR     | 54.50%  | NR     | 0      | NR                | 16.70%  | Survival              |
| Howell 2010     | 1997 - 2007 | 801  | 61.0 ± 13.0          | 56.00% | NR      | 6.00%  | 9.00%  | 43.00% | NR     | NR     | 12.00%  | NR     | NR     | 4.9               | NR      | Survival              |
| Iturra 2014     | 2002 - 2011 | 502  | 80.0 *(49.0-96.0)    | 55.00% | 80.00%  | NR     | NR     | 83.00% | 9.00%  | 63.00% | 64.00%  | 20.00% | 9.00%  | NR                | 54.00%  | Survival              |
| Joshi 2014      | 1999 – 2013 | 281  | 60.0 *** (46.0-71.0) | NR     | NR      | 13.00% | 7.00%  | 53.00% | 13.00% | NR     | NR      | NR     | NR     | NR                | NR      | SVD in SAVR           |
| Kapadia 2014    | 2007 - 2009 | 358  | NR                   | NR     | NR      | 24.00% | NR     | NR     | NR     | NR     | NR      | NR     | NR     | NR                | NR      | SVD in TAV            |
| Kato 2008       | 1986 - 2006 | 84   | 72.5 ± 5.0           | 50.00% | 17.90%  | 11.90% | 3.60%  | NR     | 4.80%  | NR     | NR      | NR     | NR     | NR                | 20.20%  | Survival              |
| Kimiyoshi 2007  | 2000 - 2004 | 233  | 73.5 ± 10.5          | 66.50% | 100.00% | 9.00%  | 30.00% | NR     | 8.20%  | NR     | 74.20%  | NR     | 30.00% | NR                | NR      | Survival              |
| Kobayashi 2009  | 2000 - 2004 | 233  | 73.6 ± 10.6          | 66.50% | NR      | 9.00%  | 30.00% | 77.70% | 9.00%  | NR     | 74.20%  | NR     | NR     | NR                | 100.00% | Survival              |
| Koos 2013       | 2008 - 2012 | 76   | 83.0 ± 6.0           | 36.80% | NR      | 35.50% | 19.70% | 96.10% | NR     | NR     | 93.40%  | NR     | NR     | 21.0 % ± 12.0 %   | NR      | SVD in TAV            |
| Kulik 2006      | 1990 - 2002 | 664  | 65.4 ± 13.5          | 65.50% | NR      | NR     | NR     | NR     | NR     | NR     | 41.40%  | NR     | NR     | NR                | NR      | Survival              |
| Levy 2008       | 1990 - 2005 | 217  | 71.0 ± 8.0           | 77.00% | 28.00%  | NR     | 25.00% | NR     | 27.00% | 28.00% | 83.00%  | NR     | 23.00% | NR                | 34.00%  | Survival              |
| Linneweber 2010 | 2002 - 2008 | 35   | 73.0 ± 6.0           | NR     | NR      | NR     | NR     | NR     | NR     | NR     | 100.00% | NR     | NR     | \$11.9%           | 14.30%  | SVD in SAVR, Survival |
| Luciani 2008    | 2000 - 2007 | 154  | 71.0 ± 9.0           | 62.00% | NR      | NR     | NR     | NR     | 0.10%  | NR     | 62.00%  | NR     | NR     | NR                | 22.00%  | Survival              |
| Matsumoto 2015  | 2000 - 2002 | 207  | 74.0 ± 8.0           | 43.50% | NR      | NR     | 22.70% | NR     | NR     | NR     | 15.00%  | NR     | NR     | NR                | 25.10%  | SVD in SAVR, Survival |

| Author                   | Year        | n    | Mean (SD)                      | 95% CI | OR     | 95% CI  | OR     | 95% CI | OR     | 95% CI | OR     | 95% CI | OR      | 95% CI | OR              | 95% CI | Outcome                                       |
|--------------------------|-------------|------|--------------------------------|--------|--------|---------|--------|--------|--------|--------|--------|--------|---------|--------|-----------------|--------|-----------------------------------------------|
| McLean 2011              | 1996 - 2009 | 4124 | 68.0 <sup>**</sup> (60.0-74.0) |        | 55.40% | NR      | 9.90%  | 8.20%  | NR     | NR     | NR     | 9.90%  | NR      | 3.80%  | NR              | NR     | Survival                                      |
| Milano 2012              | 2000 - 2005 | 85   | 76.0 ± 6.0                     |        | 27.00% | NR      | NR     | NR     | NR     | 11.50% | 58.00% | 49.40% | NR      | NR     | NR              | 13.00% | SVD in SAVR, Survival                         |
| Muneretto 2014           | 2010 - 2013 | 163  | 79.7 ± 5.0                     |        | 40.50% | 22.70%  | 30.10% | 21.50% | 76.00% | 25.10% | 54.10% | 71.80% | NR      | 4.90%  | \$19.3% ± 12.3% | NR     | Survival                                      |
| Muneretto 2015           | 2007 - 2014 | 991  | 80.0 ± 3.0                     |        | 44.20% | 31.00%  | 24.30% | 28.70% | NR     | NR     | NR     | 64.80% | NR      | 6.70%  | NR              | NR     | Survival                                      |
| Nyawo 2007               | 1998 - 2003 | 102  | 71.6 ± 7.8                     |        | 56.90% | NR      | NR     | NR     | NR     | NR     | NR     | NR     | NR      | NR     | NR              | NR     | Survival                                      |
| Nyugen 2014              | 2002-2013   | 255  | 75.6 ± 9.2                     |        | 77.20% | NR      | 38.80% | 46.70% | 95.30% | 2.30%  | 46.50% | NR     | 100.00% | NR     | NR              | NR     | Survival                                      |
| Okamura 2012             | 2005-2009   | 78   | 72.9 ± 7.7                     |        | 6.40%  | 23.10%  | NR     | 15.40% | 15.40% | 6.40%  | NR     | 44.90% | NR      | NR     | NR              | 16.70% | Survival                                      |
| Oliveira 2012            | 2002 - 2006 | 114  | 78.5 ± 2.5                     |        | 38.60% | NR      | NR     | 18.40% | NR     | 14.00% | NR     | 39.50% | NR      | NR     | NR              | NR     | Survival                                      |
| Orlowska-Baranowska 2012 | 1998-2008   | 1143 | 61.5 ± 11.0                    |        | 58.20% | 21.00%  | NR     | NR     | 39.00% | NR     | NR     | 65.00% | 16.00%  | NR     | NR              | NR     | Survival                                      |
| Papadopoulos 2014        | 2005 - 2012 | 219  | 74.4 ± 8.0                     |        | 56.20% | 39.70%  | 25.60% | 28.80% | 76.60% | NR     | 42.80% | NR     | NR      | NR     | 18.9 % ± 2.7 %  | NR     | SVD in SAVR, Survival                         |
| Petrov 2014              | 2005 - 2012 | 128  | 70.5 ± 9.5                     |        | 50.80% | 6.60%   | 15.00% | 29.00% | 87.50% | NR     | 59.50% | NR     | NR      | NR     | NR              | NR     | Survival                                      |
| Redlich 2011             | 1996 - 2010 | 60   | 73.0 ± 6.0                     |        | 75.00% | 88.00%  | 30.00% | 18.00% | 83.00% | 30.00% | 49.00% | 78.00% | NR      | 48.00% | \$27.0% ± 17.0% | 0.00%  | Stroke, Length of Stay, SVD in SAVR, Survival |
| Rodes-Cabau 2014         | N/A         | 539  | 84.1 ± 6.2                     |        | 57.70% | 76.20%  | 43.80% | 40.60% | 91.10% | 50.50% | 52.30% | 94.10% | NR      | NR     | NR              | NR     | Survival                                      |
| Rubio Alvarez 2010       | 1978 - 2008 | 202  | 68.2 ± 8.7                     |        | 15.30% | NR      | NR     | NR     | NR     | NR     | NR     | 88.10% | NR      | NR     | NR              | 0.00%  | Survival                                      |
| Santarpino 2015          | 2010        | 626  | 80.3 ± 5.6                     |        | 44.70% | NR      | 23.60% | 35.00% | 90.60% | NR     | 56.10% | NR     | NR      | NR     | 20.6% ± 14.5%   | 10.90% | Length of Stay, Survival                      |
| Scherner 2014            | 2008 - 2012 | 136  | 75.4 ± 10.9                    |        | 62.50% | 75.70%  | 11.00% | 35.30% | NR     | 22.00% | 52.80% | 80.90% | NR      | NR     | NR              | 66.20% | Survival                                      |
| Schymik 2015             | 2008 - 2012 | 1141 | 73.8 ± 7.9                     |        | 52.00% | 37.20%  | NR     | NR     | NR     | NR     | 62.40% | NR     | NR      | 4.20%  | \$7.3 ± 3.0     | NR     | Survival                                      |
| Senage 2014              | 2002 - 2007 | 617  | 76.1 ± 6.3                     |        | 45.20% | NR      | NR     | 19.60% | NR     | 15.40% | 57.00% | 30.50% | NR      | 6.80%  | 10.5% ± 10.1%   | 30.80% | SVD in SAVR, Survival                         |
| Sezai 2015               | 2000 - 2013 | 75   | 82.3 ± 2.3                     |        | 48.00% | NR      | 5.00%  | 24.00% | NR     | NR     | 58.30% | 69.30% | NR      | NR     | NR              | 24.00% | Survival                                      |
| Stassano 2006            | 1992 - 2002 | 175  | 62.7 ± 8.9                     |        | 77.10% | 100.00% | NR     | NR     | NR     | NR     | 48.90% | 62.20% | NR      | 16.60% | NR              | NR     | Survival                                      |

|                  |             |      |                   |        |        |        |         |        |        |        |        |        |        |                |        |                                  |
|------------------|-------------|------|-------------------|--------|--------|--------|---------|--------|--------|--------|--------|--------|--------|----------------|--------|----------------------------------|
| Subramanian 2012 | 2006 - 2010 | 79   | 80.4 ± 3.6        | 49.00% | NR     | 9.00%  | 52.00%  | 94.00% | NR     | 55%    | NR     | NR     | NR     | 13.0% ± 7.0%   | NR     | Length of Stay                   |
| Svennevig 2007   | 1977 - 1987 | 816  | 55.6 ± 13.0       | 70.70% | NR     | NR     | NR      | NR     | NR     | NR     | NR     | NR     | NR     | NR             | 17.00% | SVD in SAVR, Survival            |
| Timek 2015       | 1997 - 2012 | 2379 | 83.0 ± 2.0        | 77.00% | NR     | 10.00% | 30.00%  | NR     | NR     | 53.00% | 57.00% | 73.80% | NR     | NR             | 49.00% | Survival                         |
| Umezu 2009       | 1990 - 2007 | 64   | 58.3 ± 9.0        | NR     | NR     | NR     | 100.00% | NR             | 0.10%  | Afib, SVD i SAVR, Survival       |
| Une 2015         | 1970 - 2012 | 2341 | 67.8 ± 13.4       | 66.90% | NR     | NR     | NR      | NR     | NR     | 57.80% | 36.30% | NR     | NR     | NR             | 38.20% | Survival                         |
| Vohra 2010       | 2003 - 2006 | 68   | 77.0 *(60.0-89.0) | 26.50% | NR     | NR     | NR      | NR     | NR     | NR     | 88.20% | NR     | NR     | NR             | 33.80% | Survival                         |
| Wang 2014        | 2007 - 2011 | 183  | 77.9 ± 4.6        | 55.20% | NR     | NR     | 20.20%  | 59.00% | 30.00% | NR     | 87.00% | NR     | 15.30% | 10.3           | NR     | Survival                         |
| Wenaweser 2011   | 2007 - 2010 | 442  | 81.7 ± 6.0        | 48.00% | 61.10% | NR     | 22.90%  | 76.50% | 23.80% | 52.00% | 56.80% | 17.20% | 17.90% | §22.3% ± 14.6% | 10.40% | Stroke, Length of Stay, Survival |
| Yakubov 2015     | 2011 - 2012 | 489  | 83.2 ± 8.7        | 47.90% | 81.80% | 23.50% | 41.50%  | NR     | NR     | NR     | 91.80% | 39.50% | NR     | 22.6% ± 17.1%  | NR     | SVD in TAV                       |
| Yamane 2011      | 1997 - 2010 | 308  | 78.5 ± 5.0        | 55.00% | 66.00% | 22.00% | 26.00%  | 77.00% | NR     | 52.20% | 58.10% | NR     | 19.00% | NR             | 46.10% | Length of Stay, Survival         |
| Yamashita 2012   | 1982 - 2002 | 1061 | NR                | 54.00% | NR     | 8.00%  | 7.00%   | 21.00% | 12.00% | NR     | 75.00% | NR     | 4.00%  | NR             | NR     | Survival                         |
| Yoshikawa 2008   | 1980 - 1999 | 221  | 55.0 ± 14.1       | 57.00% | NR     | NR     | NR      | NR     | NR     | 69.90% | NR     | NR     | NR     | NR             | NR     | Survival                         |
| Zannis 2007      | 1998 - 2003 | 102  | 71.7 ± 7.8        | 56.90% | 61.80% | NR     | NR      | NR     | NR     | 56.80% | NR     | NR     | NR     | NR             | NR     | Survival                         |

† = Median + 25<sup>th</sup>-75<sup>th</sup> percentile  
 ‡ = Mean but no standard deviation available  
 § = Euroscore I  
 \* = Median and range  
 \*\* = Median and IQR  
 \*\*\*= Mean and range

## APPENDIX – D

### Assessment of quality in individual studies using QUIPS

| Study                | Study Participation | Study Attrition | Prognostic Factor Measurement | Outcome Measurement | Study Confounding | Statistical Analysis and Reporting | Overall RoB | Study Design  |
|----------------------|---------------------|-----------------|-------------------------------|---------------------|-------------------|------------------------------------|-------------|---------------|
| Accola 2008          | Low                 | Low             | Low                           | Low                 | Low               | Low                                | Low         | Prospective   |
| Ali 2011             | Low                 | N/A             | Low                           | Low                 | Low               | Low                                | Low         | Retrospective |
| Amabile 2014         | Moderate            | High            | Low                           | Low                 | Low               | Low                                | High        | Prospective   |
| Anselmi 2014         | Low                 | High            | Low                           | Low                 | Low               | Low                                | Moderate    | Retrospective |
| Ashikhmina 2011      | Low                 | Moderate        | Low                           | Low                 | Low               | Low                                | Low         | Retrospective |
| Aupart 2006          | Low                 | Low             | Low                           | Low                 | Low               | Low                                | Low         | Prospective   |
| Auriemma 2006        | Low                 | Low             | Low                           | Low                 | Moderate          | Low                                | Low         | Retrospective |
| Aydin 2014           | Low                 | Low             | Low                           | Low                 | Low               | Low                                | Low         | Retrospective |
| Barone-Rochette 2014 | Low                 | Low             | Low                           | Low                 | Low               | Low                                | Low         | Prospective   |
| Beholz 2010          | Low                 | High            | Low                           | Low                 | Low               | Low                                | Moderate    | Prospective   |
| Benhameid 2008       | Low                 | Low             | Low                           | Low                 | Low               | Low                                | Low         | Retrospective |
| Bernet 2007          | High                | N/A             | Moderate                      | Moderate            | Low               | Moderate                           | High        | Retrospective |
| Bourguignon 2015     | Low                 | Moderate        | Low                           | Low                 | Low               | Low                                | Low         | Prospective   |
| Bourguignon 2016     | Low                 | Low             | Low                           | Low                 | Low               | Low                                | Low         | Retrospective |
| Celiento 2014        | Moderate            | High            | Low                           | Low                 | Moderate          | Low                                | High        | Retrospective |
| Christ 2013          | Low                 | Low             | Low                           | Low                 | Low               | Low                                | Low         | Retrospective |
| Christ 2014          | Low                 | Low             | Low                           | Low                 | Low               | Low                                | Low         | Retrospective |
| Christ 2014          | Low                 | Low             | Low                           | Low                 | Low               | Low                                | Low         | Retrospective |
| Concistre 2013       | Low                 | Low             | Low                           | Low                 | Low               | Low                                | Low         | N/A           |
| D'onofrio 2013       | Moderate            | Moderate        | Moderate                      | Moderate            | Low               | Moderate                           | High        | Prospective   |
| Dagenais 2010        | Moderate            | Low             | Low                           | Low                 | Moderate          | Low                                | Moderate    | Retrospective |
| Dalen 2015           | Low                 | Low             | Low                           | Low                 | Low               | Low                                | Low         | Retrospective |
| de Vincentiis 2008   | Low                 | Low             | Low                           | Low                 | Low               | Low                                | Low         | Retrospective |
| Dewey 2008           | High                | Low             | High                          | Low                 | Low               | Low                                | High        | Retrospective |
| Ding 2010            | Low                 | Moderate        | Low                           | Moderate            | Low               | Moderate                           | Moderate    | Not Listed    |



|                 |          |          |          |          |          |          |          |               |
|-----------------|----------|----------|----------|----------|----------|----------|----------|---------------|
| Doss 2012       | Low      | Retrospective |
| Dubois 013      | Low      | Moderate | Moderate | Low      | Low      | Moderate | Moderate | Prospective   |
| Eichinger 2008  | Low      | Not Listed    |
| ElBardissi 2011 | Low      | Prospective   |
| Elhmidi 2014    | Low      | Retrospective |
| Englberger 2014 | Moderate | Low      | Low      | Low      | High     | Low      | High     | Prospective   |
| Ennker 2009     | High     | Low      | Low      | Low      | Low      | Low      | Moderate | Prospective   |
| Filsoufi 2008   | Low      | Retrospective |
| Flameng 2010    | Low      | Not Listed    |
| Fuchs 2010      | Low      | Not Listed    |
| Gaudino 2011    | Low      | Prospective   |
| George 2014     | Low      | Low      | Low      | Moderate | Low      | Moderate | Moderate | Retrospective |
| Gerckens 2011   | Low      | Prospective   |
| Glaseret 2014   | Low      | Low      | Low      | Moderate | Low      | Moderate | Moderate | Not Listed    |
| Glauber 2015    | Low      | Low      | Low      | Moderate | Low      | Low      | Low      | Retrospective |
| Grossi 2008     | High     | N/A      | Moderate | Low      | Low      | Low      | High     | Prospective   |
| Grupper 2014    | Low      | Retrospective |
| Gunter 2013     | Moderate | Moderate | Low      | Low      | Low      | Low      | Moderate | Retrospective |
| Gurvitch 2010   | Low      | N/A      | Low      | Low      | Low      | Low      | Low      | Prospective   |
| Hartzell 2011   | Moderate | High     | Low      | Low      | High     | Low      | High     | Retrospective |
| Higgins 2011    | Low      | N/A      | Low      | Low      | High     | Low      | Moderate | Retrospective |
| Hong 2013       | Low      | Prospective   |
| Horst 2011      | High     | Low      | Low      | Low      | Low      | Low      | Moderate | Retrospective |
| Hosono 2013     | Moderate | Low      | Low      | Low      | High     | Low      | High     | Retrospective |
| Howell 2010     | Low      | Prospective   |
| Iturra 2014     | Low      | Not Listed    |
| Kapadia 2014    | Low      | Not Listed    |
| Kato 2008       | Low      | Prospective   |
| Kimiyoshi 2007  | Low      | Retrospective |
| Kobayashi 2009  | Moderate | Low      | Low      | Low      | High     | Low      | High     | Retrospective |
| Koos 2013       | High     | N/A      | Low      | Low      | Moderate | Low      | High     | Retrospectie  |

|                          |          |          |          |     |          |          |          |               |
|--------------------------|----------|----------|----------|-----|----------|----------|----------|---------------|
| Kulik 2006               | Moderate | Low      | Low      | Low | Low      | Low      | Low      | Prospective   |
| Levy 2008                | Moderate | Low      | Low      | Low | Low      | Low      | Low      | Retrospective |
| Linneweber 2010          | Moderate | Low      | Low      | Low | Low      | Low      | Low      | Prospective   |
| Luciani 2008             | Moderate | Low      | Low      | Low | Moderate | Low      | Moderate | Retrospective |
| Mahmut 2013              | High     | Low      | Low      | Low | Moderate | Low      | High     | Prospective   |
| Matsumoto 2015           | Low      | Low      | Low      | Low | Low      | Low      | Low      | Prospective   |
| McLean 2011              | Low      | Low      | Low      | Low | Low      | Moderate | Low      | Prospective   |
| Milano 2012              | High     | Low      | Low      | Low | Low      | Low      | Moderate | Retrospective |
| Muneretto 2014           | Low      | Low      | Low      | Low | Low      | Low      | Low      | Prospective   |
| Muneretto 2015           | Low      | Low      | Low      | Low | Low      | Moderate | Low      | Retrospective |
| Nyawo 2007               | Low      | Low      | Low      | Low | Low      | Low      | Low      | Prospective   |
| Nyugen 2014              | Low      | Moderate | Moderate | Low | Low      | Low      | Moderate | Retrospective |
| Okamura 2012             | Low      | Low      | Low      | Low | Low      | Moderate | Low      | NR            |
| Oliveira 2012            | Low      | Low      | Low      | Low | Low      | Low      | Low      | Retrospective |
| Orlowska-Baranowska 2012 | Moderate | High     | High     | Low | Moderate | Low      | High     | Prospective   |
| Papadopoulos 2014        | Low      | Low      | Low      | Low | Low      | Low      | Low      | Prospective   |
| Petrov 2014              | Low      | Low      | Low      | Low | Low      | Low      | Low      | Prospective   |
| Redlich 2011             | Low      | Low      | Low      | Low | Low      | Low      | Low      | Retrospective |
| Rodes-Cabau 2014         | Moderate | Low      | Moderate | Low | Low      | Low      | Moderate | Retrospective |
| Rubio Alvarez 2010       | Moderate | Low      | Low      | Low | Low      | Low      | Low      | Retrospective |
| Santarpino 2015          | Moderate | High     | Low      | Low | Low      | Low      | High     | Retrospective |
| Scherner 2014            | Low      | High     | Low      | Low | Low      | Low      | Moderate | Retrospective |
| Schymik 2015             | Low      | Low      | Low      | Low | Low      | Low      | Low      | Prospective   |
| Senage 2014              | Moderate | Moderate | Low      | Low | Low      | Low      | Moderate | Prospective   |
| Sezai 2015               | High     | Moderate | Moderate | Low | Low      | Low      | High     | Retrospective |
| Stassano 2006            | Moderate | Moderate | Low      | Low | Low      | Low      | Moderate | Prospective   |
| Subramanian 2012         | Moderate | High     | Low      | Low | Low      | Low      | High     | Retrospective |
| Svennevig 2007           | High     | High     | Low      | Low | Low      | Low      | High     | Retrospective |
| Timek 2015               | High     | N/A      | Low      | Low | Moderate | Low      | High     | Retrospective |
| Umezu 2009               | High     | Low      | Low      | Low | High     | Low      | High     | Retrospective |

|                |          |          |          |     |          |     |          |               |
|----------------|----------|----------|----------|-----|----------|-----|----------|---------------|
| Une 2015       | Low      | High     | Low      | Low | Low      | Low | Moderate | Retrospective |
| Vohra 2010     | High     | Low      | Low      | Low | High     | Low | High     | Retrospective |
| Wang 2014      | Moderate | N/A      | Low      | Low | Moderate | Low | Moderate | Retrospective |
| Wenaweser 2011 | Low      | Low      | Low      | Low | Low      | Low | Low      | Prospective   |
| Yakubov 2015   | Moderate | High     | Low      | Low | Low      | Low | High     | Prospective   |
| Yamane 2011    | Low      | Low      | Low      | Low | Low      | Low | Low      | Retrospective |
| Yamashita 2012 | High     | Moderate | Low      | Low | Low      | Low | High     | Retrospective |
| Yoshikawa 2008 | High     | Low      | Moderate | Low | Low      | Low | High     | Retrospective |
| Zannis 2007    | High     | N/A      | Low      | Low | Low      | Low | Moderate | Prospective   |

---

## Appendix – E

### Forest plots for pooled estimate of effect

Figure 1A - Incidence rate of stroke by valve type

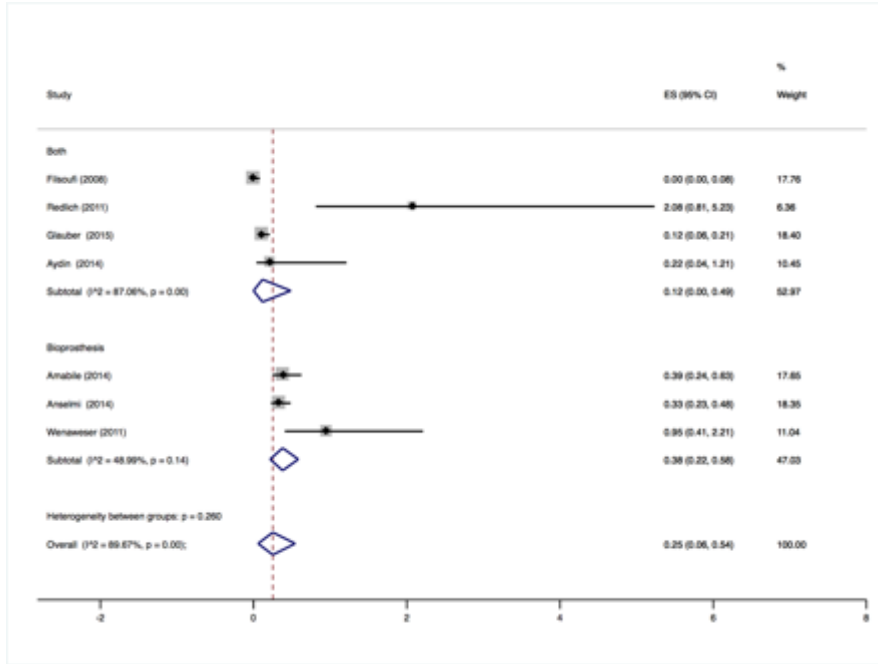

Figure 2A - Incidence rate of stroke by study quality

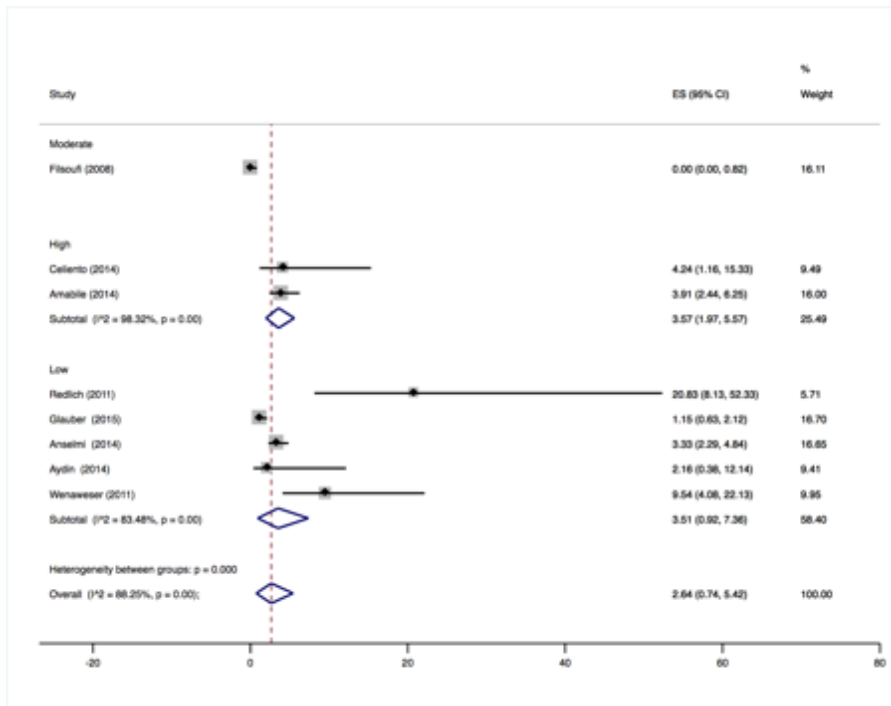

Figure 3A - Incidence rate of atrial fibrillation post SAVR

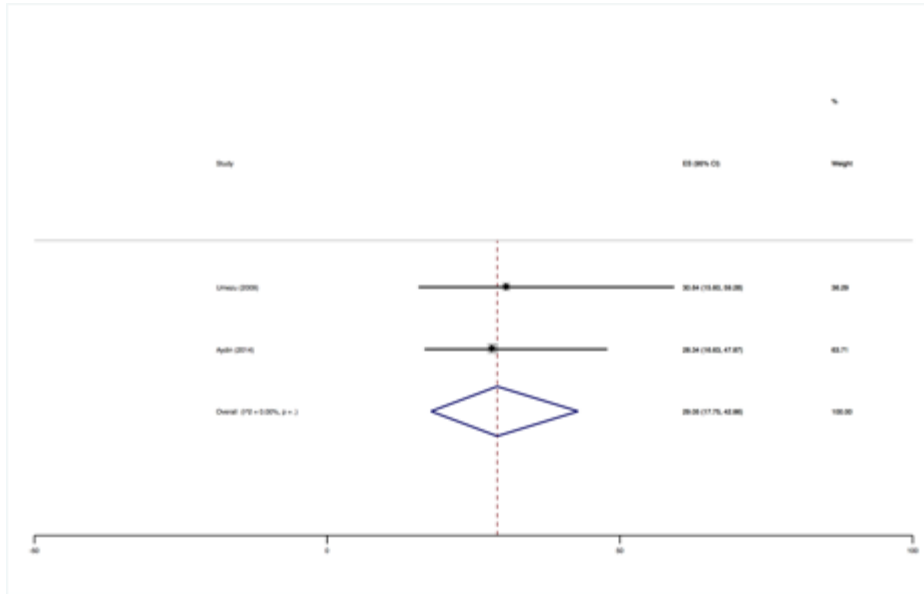

Figure 4A - Mean length of stay post SAVR

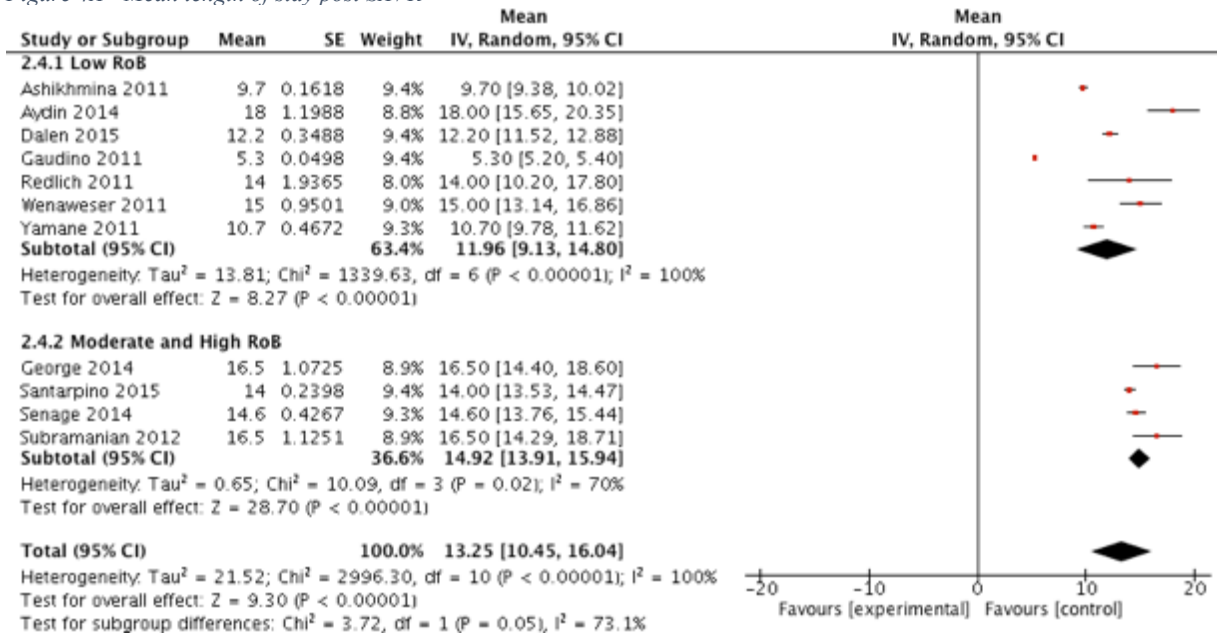

**APPENDIX – F**

**Individual studies used in pooled estimate of survival post SAVR**

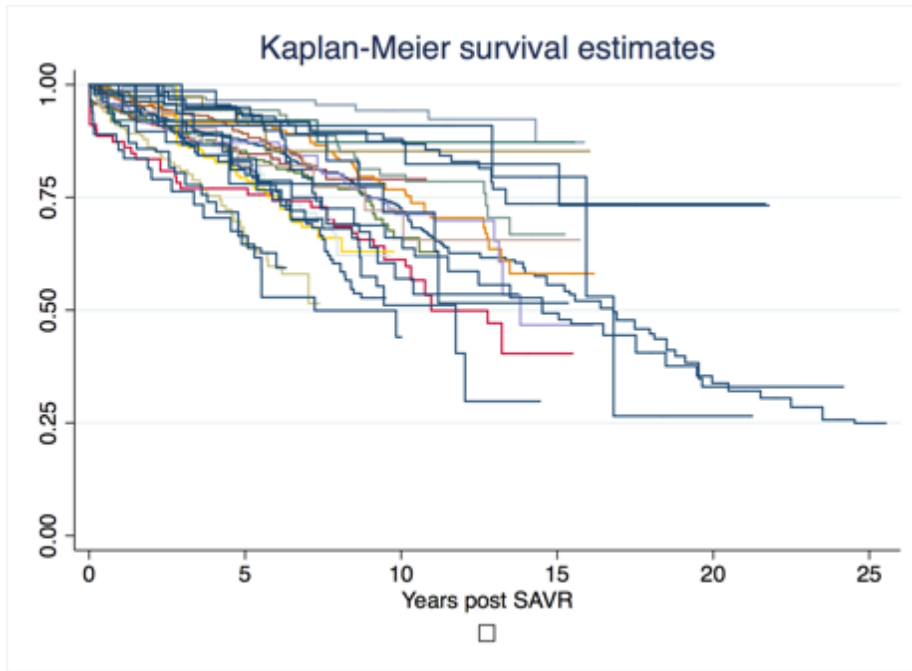

*Figure 5 Individual studies with mean age  $\leq 65$*

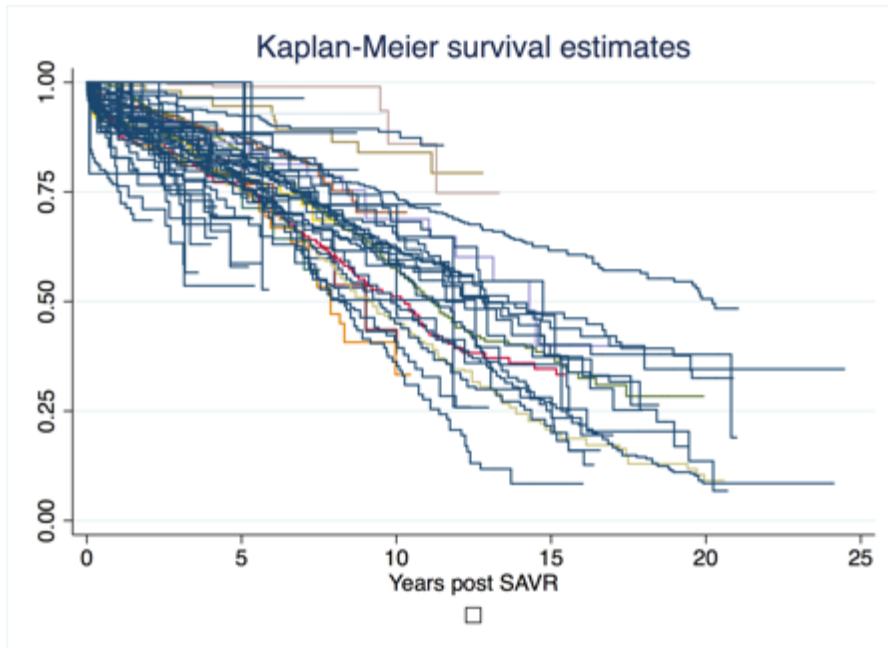

*Figure 6 Individual studies with mean age between 65 – 75*

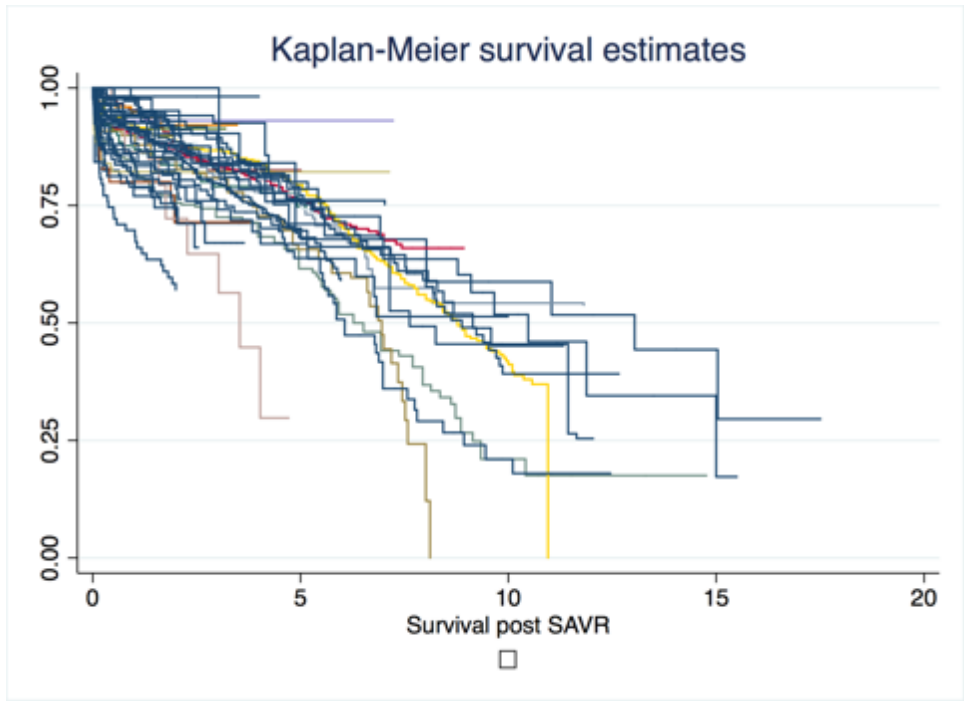

Figure 7 Individual studies with mean age between 75 – 85

## **APPENDIX – G**

### **Definitions of SVD**



| <b>Study ID</b>    | <b>Definition of SVD in SAVR</b>                                                                                                                                                                                                                                                                                                                                                                                                                            |
|--------------------|-------------------------------------------------------------------------------------------------------------------------------------------------------------------------------------------------------------------------------------------------------------------------------------------------------------------------------------------------------------------------------------------------------------------------------------------------------------|
| Amabile            | Leaflet calcification, leaflet tear                                                                                                                                                                                                                                                                                                                                                                                                                         |
| Anselmi            | SVD was defined as dysfunction or deterioration of the prosthesis (excluding infection or thrombosis) evident on echocardiography and/or at reoperation                                                                                                                                                                                                                                                                                                     |
| Ashikhmina         | Echocardiographic evidence of SVD                                                                                                                                                                                                                                                                                                                                                                                                                           |
| Aupart             | An echocardiographic definition of structural failure was indicated by a mean gradient >40 mmHg or aortic insufficiency of grade 3 or 4 (based on a scale of 1 to 4).                                                                                                                                                                                                                                                                                       |
| Auriemma           | Leaflet tear, leaflet prolapse, primary valve failure with significant regurgitation and increased NYHA class                                                                                                                                                                                                                                                                                                                                               |
| Bourguignon (2015) | The bioprosthesis was considered to have deteriorated on strict echocardiographic assessment whenever severe aortic stenosis (mean transvalvular gradient > 40 mm Hg) or severe aortic regurgitation (effective regurgitant orifice area > 0.30 cm <sup>2</sup> , vena contracta > 0.6 cm) was observed, even if the patient was asymptomatic.                                                                                                              |
| Bourguignon (2016) | Bioprosthetic valve deterioration was solely evaluated on echocardiogram based on the following criteria: severe aortic stenosis (mean transvalvular gradient >40 mmHg) and/or severe aortic regurgitation (effective regurgitant orifice area >0.30 cm <sup>2</sup> , vena contracta >0.6 cm).                                                                                                                                                             |
| Eichinger          | Structural valve deterioration was defined according to the guidelines published in 1996 [6] as a decrease of one New York Heart Association (NYHA) functional class resulting from an intrinsic abnormality of the valve that causes stenosis or regurgitation. Additionally, a mean pressure gradient exceeding 40 mm Hg was defined as structural valve deterioration                                                                                    |
| Ennker             | Cusps' rupture, mean gradient of 30 mmHg                                                                                                                                                                                                                                                                                                                                                                                                                    |
| Flameng            | The diagnosis of SVD was based on echocardiographic findings. Two types of SVD were diagnosed. A stenosis-type SVD was diagnosed when echocardiographic follow-up showed calcification of the leaflets. When the leaflets became thickened and less pliable, but the pressure gradient across the valve increased above the value at baseline to values 55 mm Hg, the valve was also diagnosed as stenotic                                                  |
| 1078Joshi          | Patients with EVD (early valve deterioration) were identified as having symptomatic stenosis or regurgitation within 6 years of implantation leading to reoperation AND " This study was carried out in accordance with the American Association for Thoracic Surgery/Society for Thoracic Surgeons/European Association for Cardio-Thoracic Surgery guidelines (2008 guidelines) for reporting valve morbidity and mortality to the best of our abilities" |
| Luciani            | Definitions were established according to recently recommended guidelines (1996 guidelines) (Edmunds LH Jr, Clarke RE, Cohn LH, et al: Guidelines for reporting mortality and morbidity after cardiac valvular operations. J Thorac Cardiovasc Surg 1996;112:708-711)                                                                                                                                                                                       |
| Mahmut             | Structural valve degeneration was defined as an increase in transprosthetic mean gradient $\geq$ 10 mmHg and/or worsening                                                                                                                                                                                                                                                                                                                                   |

|           |                                                                                                                                                                                                                                                                                                                                                                  |
|-----------|------------------------------------------------------------------------------------------------------------------------------------------------------------------------------------------------------------------------------------------------------------------------------------------------------------------------------------------------------------------|
|           | of transprosthetic regurgitation $\geq$ 1/3 class between 1-year and last follow-up echocardiograms.                                                                                                                                                                                                                                                             |
| Matsumoto | We defined structural valve deterioration (SVD) as leaflet degradation requiring reoperation, which exclude prosthetic valve endocarditis                                                                                                                                                                                                                        |
| Milano    | SPF incompetence due to a commissural tear with minimal calcification, SPF dysfunction (details of operative findings are not available)                                                                                                                                                                                                                         |
| Senage    | SVD of the bioprosthesis was defined according to the latest recommendations (different guidelines) <sup>17</sup> and according to precise echocardiographic criteria: progression of aortic transprosthetic gradient $\geq$ 30 mmHg associated with a decreased effective orifice area $\leq$ 1 cm <sup>2</sup> or intraprosthetic aortic regurgitation $>$ 2/4 |
| Svennevig | Mechanical valve failure was defined as any case of mechanical rupture of the valve                                                                                                                                                                                                                                                                              |

## APPENDIX – H

### Life tables for mortality

| Low RoB Studies        |            |        |      |          |            |                  |        |        |
|------------------------|------------|--------|------|----------|------------|------------------|--------|--------|
| Interval               | Beg. Total | Deaths | Lost | Survival | Std. Error | [95% Conf. Int.] |        |        |
| <b>Age≤65</b>          |            |        |      |          |            |                  |        |        |
| 0                      | 1          | 2261   | 70   | 76       | 0.9685     | 0.0037           | 0.9604 | 0.9750 |
| 1                      | 2          | 2115   | 37   | 73       | 0.9513     | 0.0046           | 0.9414 | 0.9595 |
| 2                      | 3          | 2005   | 106  | 61       | 0.9002     | 0.0065           | 0.8867 | 0.9122 |
| 3                      | 4          | 1838   | 48   | 150      | 0.8757     | 0.0072           | 0.8608 | 0.8891 |
| 4                      | 5          | 1640   | 49   | 116      | 0.8486     | 0.008            | 0.8322 | 0.8635 |
| 5                      | 6          | 1475   | 44   | 157      | 0.8218     | 0.0087           | 0.8041 | 0.8381 |
| 6                      | 7          | 1274   | 48   | 59       | 0.7901     | 0.0095           | 0.7709 | 0.8080 |
| 7                      | 8          | 1167   | 64   | 197      | 0.7428     | 0.0106           | 0.7214 | 0.7629 |
| 8                      | 9          | 906    | 44   | 49       | 0.7057     | 0.0114           | 0.6826 | 0.7275 |
| 9                      | 10         | 813    | 29   | 176      | 0.6775     | 0.0121           | 0.6531 | 0.7006 |
| 10                     | 11         | 608    | 36   | 46       | 0.6358     | 0.0132           | 0.6093 | 0.6611 |
| 11                     | 12         | 526    | 21   | 80       | 0.6083     | 0.0139           | 0.5804 | 0.6350 |
| 12                     | 13         | 425    | 19   | 48       | 0.5795     | 0.0148           | 0.5500 | 0.6078 |
| 13                     | 14         | 358    | 20   | 67       | 0.5438     | 0.0159           | 0.5121 | 0.5743 |
| 14                     | 15         | 271    | 6    | 80       | 0.5297     | 0.0165           | 0.4968 | 0.5614 |
| 15                     | 16         | 185    | 5    | 94       | 0.5105     | 0.018            | 0.4747 | 0.5451 |
| 16                     | 17         | 86     | 5    | 27       | 0.4753     | 0.0226           | 0.4303 | 0.5188 |
| 17                     | 18         | 54     | 3    | 10       | 0.4462     | 0.0267           | 0.3932 | 0.4977 |
| 18                     | 19         | 41     | 4    | 10       | 0.3966     | 0.0333           | 0.3312 | 0.4612 |
| 19                     | 20         | 27     | 4    | 6        | 0.3305     | 0.041            | 0.2518 | 0.4111 |
| 24                     | 25         | 17     | 0    | 17       | 0.3305     | 0.041            | 0.2518 | 0.4111 |
| <b>65&lt;Age&lt;75</b> |            |        |      |          |            |                  |        |        |
| 0                      | 1          | 13520  | 665  | 949      | 0.949      | 0.0019           | 0.9451 | 0.9527 |
| 1                      | 2          | 11906  | 497  | 1265     | 0.9072     | 0.0026           | 0.9020 | 0.9121 |
| 2                      | 3          | 10144  | 273  | 1139     | 0.8813     | 0.003            | 0.8754 | 0.8870 |
| 3                      | 4          | 8732   | 337  | 1010     | 0.8452     | 0.0034           | 0.8384 | 0.8518 |
| 4                      | 5          | 7385   | 230  | 1061     | 0.8169     | 0.0038           | 0.8093 | 0.8242 |
| 5                      | 6          | 6094   | 336  | 652      | 0.7693     | 0.0044           | 0.7606 | 0.7777 |
| 6                      | 7          | 5106   | 268  | 605      | 0.7264     | 0.0048           | 0.7167 | 0.7357 |
| 7                      | 8          | 4233   | 257  | 365      | 0.6803     | 0.0053           | 0.6697 | 0.6906 |
| 8                      | 9          | 3611   | 195  | 428      | 0.6412     | 0.0057           | 0.6299 | 0.6523 |
| 9                      | 10         | 2988   | 193  | 407      | 0.5968     | 0.0061           | 0.5846 | 0.6087 |
| 10                     | 11         | 2388   | 195  | 172      | 0.5462     | 0.0066           | 0.5332 | 0.5591 |

|    |    |      |     |     |        |        |        |        |
|----|----|------|-----|-----|--------|--------|--------|--------|
| 11 | 12 | 2021 | 119 | 751 | 0.5067 | 0.007  | 0.4928 | 0.5204 |
| 12 | 13 | 1151 | 127 | 141 | 0.4472 | 0.008  | 0.4315 | 0.4627 |
| 13 | 14 | 883  | 84  | 173 | 0.4    | 0.0086 | 0.3831 | 0.4169 |
| 14 | 15 | 626  | 65  | 145 | 0.353  | 0.0094 | 0.3347 | 0.3714 |
| 15 | 16 | 416  | 54  | 87  | 0.3019 | 0.0103 | 0.2818 | 0.3221 |
| 16 | 17 | 275  | 45  | 48  | 0.2477 | 0.0112 | 0.2261 | 0.2699 |
| 17 | 18 | 182  | 24  | 70  | 0.2073 | 0.012  | 0.1843 | 0.2313 |
| 18 | 19 | 88   | 18  | 17  | 0.1604 | 0.0135 | 0.1350 | 0.1877 |
| 19 | 20 | 53   | 10  | 13  | 0.1259 | 0.0143 | 0.0995 | 0.1555 |
| 20 | 21 | 30   | 1   | 1   | 0.1216 | 0.0145 | 0.0951 | 0.1516 |
| 24 | 25 | 28   | 0   | 28  | 0.1216 | 0.0145 | 0.0951 | 0.1516 |

**75≤Age<85**

|    |    |      |     |     |        |        |        |        |
|----|----|------|-----|-----|--------|--------|--------|--------|
| 0  | 1  | 6903 | 620 | 480 | 0.9069 | 0.0036 | 0.8997 | 0.9137 |
| 1  | 2  | 5803 | 403 | 392 | 0.8418 | 0.0045 | 0.8326 | 0.8505 |
| 2  | 3  | 5008 | 204 | 431 | 0.8059 | 0.005  | 0.7959 | 0.8155 |
| 3  | 4  | 4373 | 216 | 537 | 0.7635 | 0.0055 | 0.7525 | 0.7741 |
| 4  | 5  | 3620 | 499 | 298 | 0.6538 | 0.0066 | 0.6407 | 0.6664 |
| 5  | 6  | 2823 | 183 | 421 | 0.608  | 0.0069 | 0.5943 | 0.6214 |
| 6  | 7  | 2219 | 75  | 335 | 0.5857 | 0.0071 | 0.5716 | 0.5995 |
| 7  | 8  | 1809 | 312 | 447 | 0.4705 | 0.0082 | 0.4544 | 0.4864 |
| 8  | 9  | 1050 | 97  | 40  | 0.4262 | 0.0086 | 0.4093 | 0.4429 |
| 9  | 10 | 913  | 19  | 486 | 0.4141 | 0.0088 | 0.3969 | 0.4312 |
| 10 | 11 | 408  | 9   | 52  | 0.4043 | 0.0091 | 0.3864 | 0.4222 |
| 11 | 12 | 347  | 79  | 168 | 0.2829 | 0.0131 | 0.2575 | 0.3088 |
| 12 | 13 | 100  | 0   | 98  | 0.2829 | 0.0131 | 0.2575 | 0.3088 |
| 13 | 14 | 2    | 0   | 1   | 0.2829 | 0.0131 | 0.2575 | 0.3088 |
| 14 | 15 | 1    | 0   | 1   | 0.2829 | 0.0131 | 0.2575 | 0.3088 |

**Age≥85**

|   |   |     |    |    |        |        |        |        |
|---|---|-----|----|----|--------|--------|--------|--------|
| 0 | 1 | 119 | 25 | 11 | 0.7797 | 0.0389 | 0.6917 | 0.8454 |
| 1 | 2 | 83  | 2  | 25 | 0.7576 | 0.0408 | 0.6663 | 0.8272 |
| 2 | 3 | 56  | 1  | 12 | 0.7425 | 0.0427 | 0.6473 | 0.8155 |
| 3 | 4 | 43  | 9  | 8  | 0.5711 | 0.0599 | 0.4455 | 0.6784 |
| 4 | 5 | 26  | 2  | 5  | 0.5225 | 0.0639 | 0.3910 | 0.6385 |
| 5 | 6 | 19  | 0  | 19 | 0.5225 | 0.0639 | 0.3910 | 0.6385 |
